# Supplementary material for: Physiologically Based Pharmacokinetic Modeling Is Essential in 90Y-Labeled Anti-CD66 Radioimmunotherapy
Source: PubMed Central journal article supplement (PMC4444288; doi:10.1371/journal.pone.0127934), 2015-05-26

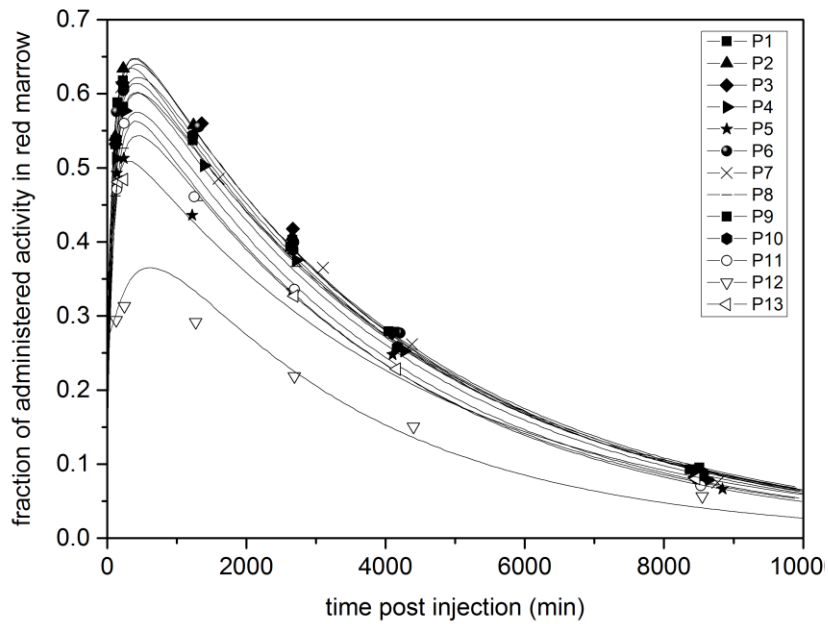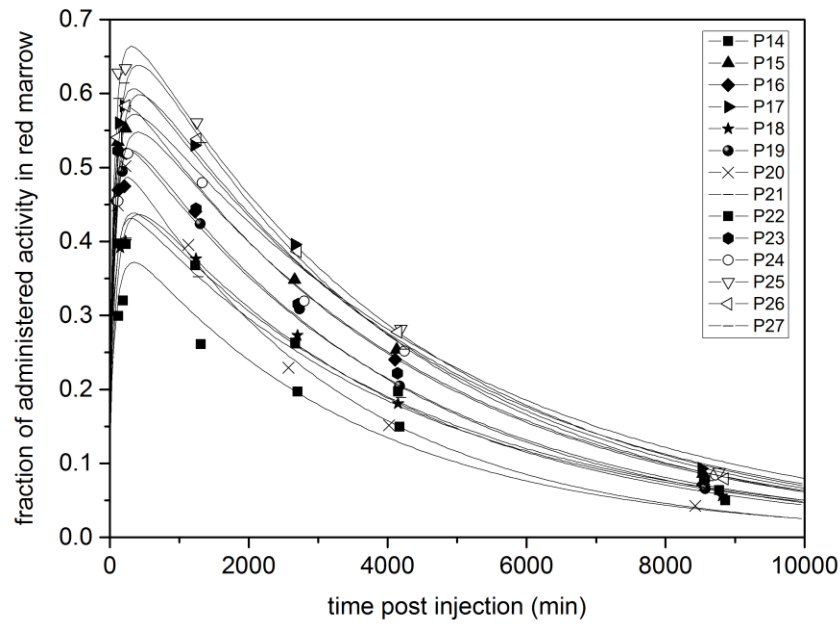

Supplement: pone.0127934.s002.pdf [file pone.0127934.s002.pdf]
