# Supplementary material for: Physiologically Based Pharmacokinetic Modeling Is Essential in 90Y-Labeled Anti-CD66 Radioimmunotherapy
Source: PubMed Central journal article supplement (PMC4444288; doi:10.1371/journal.pone.0127934), 2015-05-26
Supplement: pone.0127934.s004.pdf [file pone.0127934.s004.pdf]

## **Supplement: Model equations and parameters**

The following equations and parameters describe the biodistribution for fully-, half-, and non-immunoreactive labeled (indexed with \*) and unlabeled anti-CD66 antibodies in patients suffering from acute leukemia. All variables are defined in Tables A and B.

### **Volumes of distribution**

Antibody can freely pass [1] between the interstitial and vascular space of the liver, spleen and red marrow [2]. The available volume fraction for antibody is low [3].

Therefore, the antibody distribution volume is approximated as fraction of the total blood pool, using values reported by Leggett et al. [5]:

$$\begin{aligned}V_{RM} &= V \cdot 0.04 \\V_{GI} &= V \cdot 0.076 \\V_L &= V \cdot 0.1 \\V_S &= V \cdot 0.014\end{aligned}\tag{1}$$

## Physiologically Based Pharmacokinetic Modeling is Essential in <sup>90</sup>Y-labeled Anti-CD66 Radioimmunotherapy

Peter Kletting, Christian Maaß, Sven Reske, Ambros J. Beer, Gerhard Glatting

**Constraint for antigen numbers** (i = red marrow, liver, spleen, blood):

$$Ag_i = Ag_{0,i} - AgAb_{fa\ mono,i} - AgAb_{fa\ mono,i}^* - 2 \cdot AgAb_{fa\ bi,i} - 2 \cdot AgAb_{fa\ bi,i}^* - AgAb_{ha\ mono,i} - AgAb_{ha\ mono,i}^* \quad (2)$$

### Bound antibody

$$k_{on,bi} \cdot [Ag]_s = \frac{k_{on,mono} \cdot E \cdot Ag_i}{4 \cdot \pi \cdot r_{cell}^2 N_{cells,i}} \equiv k_{on,mono} \cdot Ag_i \cdot \alpha_i \quad (3)$$

$[Ag]_s$  represents the surface concentration of unbound antigens and  $\alpha_i$  is an abbreviation defined in Eq. (4) to simplify the notation of the differential equations. The ratio  $E = k_{on,bi} / k_{on,mono}$  used in the literature [6] basically stems from the conversion from bulk to surface concentrations using average binding site concentrations rather than a statistical mechanical model of the surface.

### Assumptions for cell numbers

Equal CD66 expression on all granulocytic cell forms and no considerable alteration due to disease is assumed. The average number of CD66 expressing cells is assumed to be 38 fold higher in the red marrow than in the blood [7] (for circulating cells).

$$N_{cells, RM} = 38 \cdot N_{cells, B,c} \quad (4)$$

$$Ag_{0, RM} = 38 \cdot Ag_{0, B}$$

The antigen numbers  $Ag_{0,L}$  and  $Ag_{0,S}$  for liver and spleen are assumed to be proportional to the number of marginating granulocytes  $N_{cells,L,m}$  and  $N_{cells,S,m}$ . To establish a relationship between the antigen numbers for liver and spleen and the number of circulating granulocytes, literature values were used [8]. The numbers of

## Physiologically Based Pharmacokinetic Modeling is Essential in <sup>90</sup>Y-labeled Anti-CD66 Radioimmunotherapy

Peter Kletting, Christian Maaß, Sven Reske, Ambros J. Beer, Gerhard Glatting

circulating and marginating  $N_{cells, B, c}$  and  $N_{cells, B, m}$  are 40 % and 60% of the total blood granulocytes pool, respectively.

$$N_{cells, B, m} = 1.5 \cdot N_{cells, B, c} \quad (5)$$

According to [8], the number of marginating granulocytes in liver and spleen

$N_{cells, L, m}$  and  $N_{cells, S, m}$  are equal to 60% of the total blood marginating granulocytes.

$$N_{cells, B, m} = (N_{cells, L, m} + N_{cells, S, m}) \cdot 0.6 \quad (6)$$

Therefore, the sum of the numbers of fix CD66 positive cells in the liver and spleen is set equal to 90% of the circulating CD66 positive cells in the blood (Model 1).

$$N_{cells, B, c} = (N_{cells, L, m} + N_{cells, S, m}) \cdot 0.9 \quad (7)$$

Model 2 includes weighting factors which take into account the actual sizes of the spleen or liver, as larger deviations to the calculated size (based on parameters such as age and body weight [9,10] ) might alter the average number of CD66 positive cells in these organs.

### Model 1:

$$Ag_{0, B} = (Ag_{0, L} + Ag_{0, S}) \cdot 0.9 \quad (8)$$

### Model 2:

$$Ag_{0, B} = (Ag_{0, L} \cdot \frac{V_{MRI, L}}{V_{Cal, L}} + Ag_{0, S} \cdot \frac{V_{MRI, S}}{V_{Cal, S}}) \cdot 0.9 \quad (9)$$

## Physiologically Based Pharmacokinetic Modeling is Essential in <sup>90</sup>Y-labeled Anti-CD66 Radioimmunotherapy

Peter Kletting, Christian Maaß, Sven Reske, Ambros J. Beer, Gerhard Glatting

### Injections:

Total amount of radiolabeled and unlabeled injected antibody

$$\begin{aligned}
 Ab_{inj,PT}^* &= a \cdot f_{l,PT} \cdot Ab_{total,PT} \cdot \frac{A_{inj,PT}}{A_{total,PT}} \\
 Ab_{inj,PT} &= (1 - a \cdot f_{l,PT}) \cdot Ab_{total,PT} \cdot \frac{A_{inj,PT}}{A_{total,PT}} \\
 Ab_{inj,T}^* &= b \cdot f_{l,T} \cdot Ab_{total,T} \cdot \frac{A_{inj,T}}{A_{total,T}} \\
 Ab_{inj,T} &= (1 - b \cdot f_{l,T}) \cdot Ab_{total,T} \cdot \frac{A_{inj,T}}{A_{total,T}}
 \end{aligned} \tag{10}$$

The antibody (composed of labeled and unlabeled fractions) was injected as a bolus into the “free main vascular compartments” (Figure 1) for pre-therapeutic measurements (PTM) and therapy. The individually determined radiochemical purities for therapy,  $a$ , and pre-therapeutic measurements,  $b$ , were used.

Amount of fully intact radiolabeled and unlabeled injected antibody

$$\begin{aligned}
 Ab_{fa,inj,PT}^* &= Ab_{inj,PT}^* \cdot r^2 \\
 Ab_{fa,inj,T}^* &= Ab_{inj,T}^* \cdot r^2
 \end{aligned} \tag{11}$$

$$\begin{aligned}
 Ab_{fa,inj,PT} &= Ab_{inj,PT} \cdot r^2 \\
 Ab_{fa,inj,T} &= Ab_{inj,T} \cdot r^2
 \end{aligned} \tag{12}$$

Amount of half immunoreactive radiolabeled and unlabeled injected antibody:

$$\begin{aligned}
 Ab_{ha,inj,PT}^* &= Ab_{inj,PT}^* \cdot 2 \cdot (1 - r) \cdot r \\
 Ab_{ha,inj,T}^* &= Ab_{inj,T}^* \cdot 2 \cdot (1 - r) \cdot r
 \end{aligned} \tag{13}$$

$$\begin{aligned}
 Ab_{ha,inj,PT} &= Ab_{inj,PT} \cdot 2 \cdot (1 - r) \cdot r \\
 Ab_{ha,inj,T} &= Ab_{inj,T} \cdot 2 \cdot (1 - r) \cdot r
 \end{aligned} \tag{14}$$

Amount of non-immunoreactive radiolabeled and unlabeled injected antibody:

# Physiologically Based Pharmacokinetic Modeling is Essential in <sup>90</sup>Y-labeled Anti-CD66 Radioimmunotherapy

Peter Kletting, Christian Maaß, Sven Reske, Ambros J. Beer, Gerhard Glatting

$$Ab_{na,inj,PT}^* = Ab_{inj,PT}^* \cdot (1-r)^2 \quad (15)$$

$$Ab_{na,inj,T}^* = Ab_{inj,T}^* \cdot (1-r)^2$$

$$Ab_{na,inj,PT} = Ab_{inj,PT} \cdot (1-r)^2 \quad (16)$$

$$Ab_{na,inj,T} = Ab_{inj,T} \cdot (1-r)^2$$

## Data assigned to compartments:

### Liver

$$data_L = AgAb_{fabi,L}^* + AgAb_{fa\ mono,L}^* + Ab_{fa,L}^* + AgAb_{ha\ mono,L}^* + Ab_{ha,L}^* + Ab_{na,L}^* \\ + ex_l \cdot (Ex_{fa}^* + Ex_{ha}^* + Ex_{na}^*) + \frac{V_L}{V} \cdot (Meta_{fa,P}^* + Meta_{ha,P}^* + Meta_{na,P}^* \\ + AgAb_{fabi,B}^* + AgAb_{fa\ mono,B}^* + AgAb_{ha\ mono,B}^*) + int_L \cdot (Ab_{fa\ int}^* + Ab_{ha\ int}^* + Ab_{na\ int}^*) \quad (17)$$

### Spleen

$$data_S = AgAb_{fabi,S}^* + AgAb_{fa\ mono,S}^* + Ab_{fa,S}^* + AgAb_{ha\ mono,S}^* + Ab_{ha,S}^* + Ab_{na,S}^* \\ + ex_s \cdot (Ex_{fa}^* + Ex_{ha}^* + Ex_{na}^*) + \frac{V_S}{V} \cdot (Meta_{fa,P}^* + Meta_{ha,P}^* + Meta_{na,P}^* \\ + AgAb_{fabi,B}^* + AgAb_{fa\ mono,B}^* + AgAb_{ha\ mono,B}^*) + int_S \cdot (Ab_{fa\ int}^* + Ab_{ha\ int}^* + Ab_{na\ int}^*) \quad (18)$$

### Serum

$$data_{Serum} = \frac{(Ab_{fa,P}^* + Ab_{ha,P}^* + Ab_{na,P}^*) + \frac{V_P}{V} (Meta_{fa,P}^* + Meta_{ha,P}^* + Meta_{na,P}^*)}{V_P} \quad (19)$$

### Red Marrow

$$data_{RM_{L2-L4}} \cdot K = c_{rm} \cdot \left[ \begin{array}{l} AgAb_{fabi, RM}^* + AgAb_{fa\ mono, RM}^* + Ab_{fa, RM}^* \\ + AgAb_{ha\ mono, RM}^* + Ab_{ha, RM}^* + Ab_{na, RM}^* \\ + \frac{V_{RM}}{V} \cdot (Meta_{fa,P}^* + Meta_{ha,P}^* + Meta_{na,P}^* + AgAb_{fabi,B}^* \\ + AgAb_{fa\ mono,B}^* + AgAb_{ha\ mono,B}^*) + X \end{array} \right] \quad (20)$$

## Physiologically Based Pharmacokinetic Modeling is Essential in <sup>90</sup>Y-labeled Anti-CD66 Radioimmunotherapy

Peter Kletting, Christian Maaß, Sven Reske, Ambros J. Beer, Gerhard Glatting

$x$  = underlying activity from arteries and veins in the red marrow. In ROI<sub>L2-L4</sub> these are considered using equation (18)

$$x = \frac{V_{ROI,L2-L4}}{V_P} \left[ \begin{aligned} &(Ab_{fa,P}^* + Ab_{ha,P}^* + Ab_{na,P}^*) \\ &+ \frac{V_P}{V} (Meta_{fa,P}^* + Meta_{ha,P}^* + Meta_{na,P}^* + AgAb_{fabi,B}^*) \\ &+ AgAb_{fa,mono,B}^* + AgAb_{ha,mono,B}^* \end{aligned} \right] \quad (21)$$

**TABLE A. Definition of parameters for data assignment**

|          | Description                                                                                                                        | Value                      | Unit  | Source |
|----------|------------------------------------------------------------------------------------------------------------------------------------|----------------------------|-------|--------|
| $ex_L$   | liver fraction of extravascular delay compartment                                                                                  | estimated                  | unity | [1]    |
| $ex_S$   | spleen fraction of extravascular delay compartment                                                                                 | estimated                  | unity | [1]    |
| $int_L$  | liver fraction of nonsaturable compartment                                                                                         | 0.04                       | unity | [1]    |
| $int_S$  | spleen fraction of nonsaturable compartment                                                                                        | 0.04                       | unity | [1]    |
| $K$      | height corrected scaling factor of reference man implemented in UImDos to scale from L2-L4 (lumbar spine) to the entire red marrow | 170cm/ height (cm)/0.06665 | unity | [11]   |
| $c_{rm}$ | individual correction for inadequate $K$                                                                                           | estimated                  | unity |        |

# Physiologically Based Pharmacokinetic Modeling is Essential in <sup>90</sup>Y-labeled Anti-CD66 Radioimmunotherapy

Peter Kletting, Christian Maaß, Sven Reske, Ambros J. Beer, Gerhard Glatting

## Description of global model: Part A, fully immunoreactive antibody

### Bivalent compartments

$$\begin{aligned} \frac{d}{dt} [AgAb_{fa bi, i}] \cdot V_i &= k_{on, mono} \cdot \alpha_i \cdot Ag_i \cdot AgAb_{fa mono, i} - 2 \cdot k_{off} \cdot AgAb_{fa bi, i} \\ &\quad - \lambda_{db} \cdot AgAb_{fa bi, i} + \lambda_{phy} \cdot AgAb_{fa bi, i}^* \end{aligned} \quad (22)$$

$$\begin{aligned} \frac{d}{dt} [AgAb_{fa bi, i}^*] \cdot V_i &= k_{on, mono} \cdot \alpha_i \cdot Ag_i \cdot AgAb_{fa mono, i}^* - 2 \cdot k_{off} \cdot AgAb_{fa bi, i}^* \\ &\quad - \lambda_{db} \cdot AgAb_{fa bi, i}^* - \lambda_{phy} \cdot AgAb_{fa bi, i}^* \end{aligned}$$

### Monovalent compartments

$$\begin{aligned} \frac{d}{dt} [AgAb_{fa mono, i}] \cdot V_i &= 2 \cdot k_{on, mono} \cdot Ag_i \cdot \frac{Ab_{fa i}}{V_i} - k_{on, mono} \cdot \alpha_i \cdot Ag_i \cdot AgAb_{fa mono, i} \\ &\quad - k_{off} \cdot AgAb_{fa mono, i} + 2 \cdot k_{off} \cdot AgAb_{fa bi, i} - \lambda_{db} \cdot AgAb_{fa mono, i} + \lambda_{phy} \cdot AgAb_{fa mono, i}^* \end{aligned} \quad (23)$$

$$\begin{aligned} \frac{d}{dt} [AgAb_{fa mono, i}^*] \cdot V_i &= 2 \cdot k_{on, mono} \cdot Ag_i \cdot \frac{Ab_{fa i}^*}{V_i} - k_{on, mono} \cdot \alpha_i \cdot Ag_i \cdot AgAb_{fa mono, i}^* \\ &\quad - k_{off} \cdot AgAb_{fa mono, i}^* + 2 \cdot k_{off} \cdot AgAb_{fa bi, i}^* - \lambda_{db} \cdot AgAb_{fa mono, i}^* - \lambda_{phy} \cdot AgAb_{fa mono, i}^* \end{aligned}$$

### Free antibody (i = red marrow, spleen):

$$\begin{aligned} \frac{d}{dt} [Ab_{fa i}] \cdot V_i &= -2 \cdot k_{on, mono} \cdot Ag_i \cdot \frac{Ab_{fa i}}{V_i} + k_{off} \cdot AgAb_{fa mono, i} + \frac{F_i}{V_P} \cdot Ab_{fa P} \\ &\quad - \frac{F_i}{V_i} \cdot Ab_{fa i} + \lambda_{phy} \cdot Ab_{fa i}^* \end{aligned} \quad (24)$$

$$\begin{aligned} \frac{d}{dt} [Ab_{fa i}^*] \cdot V_i &= -2 \cdot k_{on, mono} \cdot Ag_i \cdot \frac{Ab_{fa i}^*}{V_i} + k_{off} \cdot AgAb_{fa mono, i}^* + \frac{F_i}{V_P} \cdot Ab_{fa P}^* \\ &\quad - \frac{F_i}{V_i} \cdot Ab_{fa i}^* - \lambda_{phy} \cdot Ab_{fa i}^* \end{aligned}$$

### Free antibody liver

$$\begin{aligned} \frac{d}{dt} [Ab_{fa L}] \cdot V_L &= -2 \cdot k_{on, mono} \cdot Ag_L \cdot \frac{Ab_{fa L}}{V_L} + k_{off} \cdot AgAb_{fa mono, L} + \frac{F_L}{V_P} \cdot Ab_{fa P} + \frac{F_S}{V_S} \cdot Ab_{fa S} \\ &\quad + \frac{F_{GL}}{V_{GL}} \cdot Ab_{fa GL} - \frac{F_L + F_S + F_{GL}}{V_L} \cdot Ab_{fa L} + \lambda_{phy} \cdot Ab_{fa L}^* \end{aligned} \quad (25)$$

$$\begin{aligned} \frac{d}{dt} [Ab_{fa L}^*] \cdot V_L &= -2 \cdot k_{on, mono} \cdot Ag_L \cdot \frac{Ab_{fa L}^*}{V_L} + k_{off} \cdot AgAb_{fa mono, L}^* + \frac{F_L}{V_P} \cdot Ab_{fa P}^* + \frac{F_S}{V_S} \cdot Ab_{fa S}^* \\ &\quad + \frac{F_{GL}}{V_{GL}} \cdot Ab_{fa GL}^* - \frac{F_L + F_S + F_{GL}}{V_L} \cdot Ab_{fa L}^* - \lambda_{phy} \cdot Ab_{fa L}^* \end{aligned}$$

# Physiologically Based Pharmacokinetic Modeling is Essential in <sup>90</sup>Y-labeled Anti-CD66 Radioimmunotherapy

Peter Kletting, Christian Maaß, Sven Reske, Ambros J. Beer, Gerhard Glatting

## Free antibody gastrointestinal tract

$$\begin{aligned}\frac{d}{dt} [Ab_{fa\ GI}].V_{GI} &= \frac{F_{GI}}{V_P} \cdot Ab_{fa\ P} - \frac{F_{GI}}{V_{GI}} \cdot Ab_{fa\ GI} + \lambda_{phy} \cdot Ab_{fa\ GI}^* \\ \frac{d}{dt} [Ab_{fa\ GI}^*].V_{GI} &= \frac{F_{GI}}{V_P} \cdot Ab_{fa\ P}^* - \frac{F_{GI}}{V_{GI}} \cdot Ab_{fa\ GI}^* - \lambda_{phy} \cdot Ab_{fa\ GI}^*\end{aligned}\quad (26)$$

## Free antibody interstitial

$$\begin{aligned}\frac{d}{dt} Ab_{fa\ int} &= k_{in} \cdot Ab_{fa\ P} - k_{out} \cdot Ab_{fa\ int} + \lambda_{phy} \cdot Ab_{fa\ int}^* \\ \frac{d}{dt} Ab_{fa\ int}^* &= k_{in} \cdot Ab_{fa\ P}^* - k_{out} \cdot Ab_{fa\ int}^* - \lambda_{phy} \cdot Ab_{fa\ int}^*\end{aligned}\quad (27)$$

## Free main vascular compartment

$$\begin{aligned}\frac{d}{dt} [Ab_{fa\ P}].V_P &= -2 \cdot k_{on, mono} \cdot Ag_P \cdot \frac{Ab_{fa\ P}}{V_P} + k_{off} \cdot AgAb_{fa\ mono, P} - \frac{F_L + F_S + F_{GI} + F_{RM}}{V_P} \cdot Ab_{fa\ P} \\ &\quad + \frac{F_L + F_S + F_{GI}}{V_L} \cdot Ab_{fa\ L} + \frac{F_{RM}}{V_{RM}} \cdot Ab_{fa\ RM} - (\lambda_{du} + k_{in}) \cdot Ab_{fa\ P} + k_{out} \cdot Ab_{fa\ int} + \lambda_{phy} \cdot Ab_{fa\ P}^* \\ \frac{d}{dt} [Ab_{fa\ P}^*].V_P &= -2 \cdot k_{on, mono} \cdot Ag_P \cdot \frac{Ab_{fa\ P}^*}{V_P} + k_{off} \cdot AgAb_{fa\ mono, P}^* - \frac{F_L + F_S + F_{GI} + F_{RM}}{V_P} \cdot Ab_{fa\ P}^* \\ &\quad + \frac{F_L + F_S + F_{GI}}{V_L} \cdot Ab_{fa\ L}^* + \frac{F_{RM}}{V_{RM}} \cdot Ab_{fa\ RM}^* - (\lambda_{du} + k_{in} + \lambda_{phy}) \cdot Ab_{fa\ P}^* + k_{out} \cdot Ab_{fa\ int}^*\end{aligned}\quad (28)$$



# Physiologically Based Pharmacokinetic Modeling is Essential in <sup>90</sup>Y-labeled Anti-CD66 Radioimmunotherapy

Peter Kletting, Christian Maaß, Sven Reske, Ambros J. Beer, Gerhard Glatting

## Description of global model: Part B, half immunoreactive antibody

### Monovalent compartments

$$\begin{aligned} \frac{d}{dt} [AgAb_{ha\ mono,i}] \cdot V_i &= 2 \cdot k_{on, mono} \cdot Ag_i \cdot \frac{Ab_{hai}}{V_i} - k_{on, mono} \cdot \alpha_i \cdot Ag_i \cdot AgAb_{ha\ mono,i} - \\ & k_{off} \cdot AgAb_{ha\ mono,i} + 2 \cdot k_{off} \cdot AgAb_{ha\ bi,i} - \lambda_{db} \cdot AgAb_{ha\ mono,i} + \lambda_{phy} \cdot AgAb_{ha\ mono,i}^* \quad (29) \\ \frac{d}{dt} [AgAb_{ha\ mono,i}^*] \cdot V_i &= 2 \cdot k_{on, mono} \cdot Ag_i \cdot \frac{Ab_{hai}^*}{V_i} - k_{on, mono} \cdot \alpha_i \cdot Ag_i \cdot AgAb_{ha\ mono,i}^* - \\ & k_{off} \cdot AgAb_{ha\ mono,i}^* + 2 \cdot k_{off} \cdot AgAb_{ha\ bi,i}^* - \lambda_{db} \cdot AgAb_{ha\ mono,i}^* - \lambda_{phy} \cdot AgAb_{ha\ mono,i}^* \end{aligned}$$

**Free antibody** (i = red marrow, spleen):

$$\begin{aligned} \frac{d}{dt} [Ab_{hai}] \cdot V_i &= -2 \cdot k_{on, mono} \cdot Ag_i \cdot \frac{Ab_{hai}}{V_i} + k_{off} \cdot AgAb_{ha\ mono,i} + \frac{F_i}{V_P} \cdot Ab_{haP} \\ & - \frac{F_i}{V_i} \cdot Ab_{hai} + \lambda_{phy} \cdot Ab_{hai}^* \quad (30) \\ \frac{d}{dt} [Ab_{hai}^*] \cdot V_i &= -2 \cdot k_{on, mono} \cdot Ag_i \cdot \frac{Ab_{hai}^*}{V_i} + k_{off} \cdot AgAb_{ha\ mono,i}^* + \frac{F_i}{V_P} \cdot Ab_{haP}^* \\ & - \frac{F_i}{V_i} \cdot Ab_{hai}^* - \lambda_{phy} \cdot Ab_{hai}^* \end{aligned}$$

**Free antibody liver**

$$\begin{aligned} \frac{d}{dt} [Ab_{haL}] \cdot V_L &= -2 \cdot k_{on, mono} \cdot Ag_L \cdot \frac{Ab_{haL}}{V_L} + k_{off} \cdot AgAb_{ha\ mono,L} + \frac{F_L}{V_P} \cdot Ab_{haP} + \frac{F_S}{V_S} \cdot Ab_{haS} \\ & + \frac{F_{Gl}}{V_{Gl}} \cdot Ab_{haGl} - \frac{F_L + F_S + F_{Gl}}{V_L} \cdot Ab_{haL} + \lambda_{phy} \cdot Ab_{haL}^* \quad (31) \\ \frac{d}{dt} [Ab_{haL}^*] \cdot V_L &= -2 \cdot k_{on, mono} \cdot Ag_L \cdot \frac{Ab_{haL}^*}{V_L} + k_{off} \cdot AgAb_{ha\ mono,L}^* + \frac{F_L}{V_P} \cdot Ab_{haP}^* + \frac{F_S}{V_S} \cdot Ab_{haS}^* \\ & + \frac{F_{Gl}}{V_{Gl}} \cdot Ab_{haGl}^* - \frac{F_L + F_S + F_{Gl}}{V_L} \cdot Ab_{haL}^* - \lambda_{phy} \cdot Ab_{haL}^* \end{aligned}$$

# Physiologically Based Pharmacokinetic Modeling is Essential in <sup>90</sup>Y-labeled Anti-CD66 Radioimmunotherapy

Peter Kletting, Christian Maaß, Sven Reske, Ambros J. Beer, Gerhard Glatting

## Free antibody gastrointestinal tract

$$\begin{aligned}\frac{d}{dt} [Ab_{haGI}] \cdot V_{GI} &= \frac{F_{GI}}{V_P} \cdot Ab_{haP} - \frac{F_{GI}}{V_{GI}} \cdot Ab_{haGI} + \lambda_{phy} \cdot Ab_{haGI}^* \\ \frac{d}{dt} [Ab_{haGI}^*] \cdot V_{GI} &= \frac{F_{GI}}{V_P} \cdot Ab_{haP}^* - \frac{F_{GI}}{V_{GI}} \cdot Ab_{haGI}^* - \lambda_{phy} \cdot Ab_{haGI}^*\end{aligned}\quad (32)$$

## Free antibody interstitial

$$\begin{aligned}\frac{d}{dt} Ab_{haint} &= k_{in} \cdot Ab_{haP} - k_{out} \cdot Ab_{haint} + \lambda_{phy} \cdot Ab_{haint}^* \\ \frac{d}{dt} Ab_{haint}^* &= k_{in} \cdot Ab_{haP}^* - k_{out} \cdot Ab_{haint}^* - \lambda_{phy} \cdot Ab_{haint}^*\end{aligned}\quad (33)$$

## Free main vascular compartment

$$\begin{aligned}\frac{d}{dt} [Ab_{haP}] \cdot V_P &= -2 \cdot k_{on, mono} \cdot Ag_P \cdot \frac{Ab_{haP}}{V_P} + k_{off} \cdot AgAb_{ha mono, P} - \frac{F_L + F_S + F_{GI} + F_{RM}}{V_P} \cdot Ab_{haP} \\ &+ \frac{F_L + F_S + F_{GI}}{V_L} \cdot Ab_{haL} + \frac{F_{RM}}{V_{RM}} \cdot Ab_{haRM} - (\lambda_{du} + k_{in}) \cdot Ab_{haP} + k_{out} \cdot Ab_{haint} + \lambda_{phy} \cdot Ab_{haP}^* \\ \frac{d}{dt} [Ab_{haP}^*] \cdot V_P &= -2 \cdot k_{on, mono} \cdot Ag_P \cdot \frac{Ab_{haP}^*}{V_P} + k_{off} \cdot AgAb_{ha mono, P}^* - \frac{F_L + F_S + F_{GI} + F_{RM}}{V_P} \cdot Ab_{haP}^* \\ &+ \frac{F_L + F_S + F_{GI}}{V_L} \cdot Ab_{haL}^* + \frac{F_{RM}}{V_{RM}} \cdot Ab_{haRM}^* - (\lambda_{du} + k_{in} + \lambda_{phy}) \cdot Ab_{haP}^* + k_{out} \cdot Ab_{haint}^*\end{aligned}\quad (34)$$

# Physiologically Based Pharmacokinetic Modeling is Essential in <sup>90</sup>Y-labeled Anti-CD66 Radioimmunotherapy

Peter Kletting, Christian Maaß, Sven Reske, Ambros J. Beer, Gerhard Glatting

## Description of global model: Part C, none immunoreactive antibody

**Free antibody** (i = red marrow, spleen):

$$\begin{aligned}\frac{d}{dt}[Ab_{nai}] \cdot V_i &= -\frac{F_i}{V_P} \cdot Ab_{naP} - \frac{F_i}{V_i} \cdot Ab_{nai} + \lambda_{phy} \cdot Ab_{nai}^* \\ \frac{d}{dt}[Ab_{nai}^*] \cdot V_i &= +\frac{F_i}{V_P} \cdot Ab_{naP}^* - \frac{F_i}{V_i} \cdot Ab_{nai}^* - \lambda_{phy} \cdot Ab_{nai}^*\end{aligned}\quad (35)$$

**Free antibody liver**

$$\begin{aligned}\frac{d}{dt}[Ab_{naL}] \cdot V_L &= +\frac{F_L}{V_P} \cdot Ab_{naP} + \frac{F_S}{V_S} \cdot Ab_{naS} + \frac{F_{GI}}{V_{GI}} \cdot Ab_{naGI} - \frac{F_L + F_S + F_{GI}}{V_L} \cdot Ab_{naL} + \lambda_{phy} \cdot Ab_{naL}^* \\ \frac{d}{dt}[Ab_{naL}^*] \cdot V_L &= +\frac{F_L}{V_P} \cdot Ab_{naP}^* + \frac{F_S}{V_S} \cdot Ab_{naS}^* + \frac{F_{GI}}{V_{GI}} \cdot Ab_{naGI}^* - \frac{F_L + F_S + F_{GI}}{V_L} \cdot Ab_{naL}^* - \lambda_{phy} \cdot Ab_{naL}^*\end{aligned}\quad (36)$$

**Free antibody gastrointestinal tract**

$$\begin{aligned}\frac{d}{dt}[Ab_{naGI}] \cdot V_{GI} &= \frac{F_{GI}}{V_P} \cdot Ab_{naP} - \frac{F_{GI}}{V_{GI}} \cdot Ab_{naGI} + \lambda_{phy} \cdot Ab_{naGI}^* \\ \frac{d}{dt}[Ab_{naGI}^*] \cdot V_{GI} &= \frac{F_{GI}}{V_P} \cdot Ab_{naP}^* - \frac{F_{GI}}{V_{GI}} \cdot Ab_{naGI}^* - \lambda_{phy} \cdot Ab_{naGI}^*\end{aligned}\quad (37)$$

**Free antibody interstitial**

$$\begin{aligned}\frac{d}{dt} Ab_{na\text{int}} &= k_{in} \cdot Ab_{naP} - k_{out} \cdot Ab_{na\text{int}} + \lambda_{phy} \cdot Ab_{na\text{int}}^* \\ \frac{d}{dt} Ab_{na\text{int}}^* &= k_{in} \cdot Ab_{naP}^* - k_{out} \cdot Ab_{na\text{int}}^* - \lambda_{phy} \cdot Ab_{na\text{int}}^*\end{aligned}\quad (38)$$

# Physiologically Based Pharmacokinetic Modeling is Essential in <sup>90</sup>Y-labeled Anti-CD66 Radioimmunotherapy

Peter Kletting, Christian Maaß, Sven Reske, Ambros J. Beer, Gerhard Glatting

## Free main vascular compartment

$$\begin{aligned}
 \frac{d}{dt} [Ab_{naP}] \cdot V_P &= -\frac{F_L + F_S + F_{GI} + F_{RM}}{V_P} \cdot Ab_{naP} \\
 &\quad + \frac{F_L + F_S + F_{GI}}{V_L} \cdot Ab_{naL} + \frac{F_{RM}}{V_{RM}} \cdot Ab_{naRM} - (\lambda_{du} + k_{in}) \cdot Ab_{naP} \\
 &\quad + k_{out} \cdot Ab_{haInt} + \lambda_{phy} \cdot Ab_{haP}^* \\
 \frac{d}{dt} [Ab_{naP}^*] \cdot V_P &= -\frac{F_L + F_S + F_{GI} + F_{RM}}{V_P} \cdot Ab_{naP}^* + \frac{F_L + F_S + F_{GI}}{V_L} \cdot Ab_{naL}^* + \frac{F_{RM}}{V_{RM}} \cdot Ab_{naRM}^* \\
 &\quad - (\lambda_{du} + k_{in} + \lambda_{phy}) \cdot Ab_{naP}^* + k_{out} \cdot Ab_{naInt}^*
 \end{aligned} \tag{39}$$

## Submodel (for j=fa, ha, na)

The following sub model for degraded antibody (<sup>111</sup>In-DTPA and <sup>111</sup>In-low molecular weight biodistribution) was adopted from Eger et al. [1]. The variables are defined in Table A.

$$\frac{d}{dt} Ex_j = \lambda_{du} \cdot Ab_P - \lambda_{clex} \cdot Ex_j + \lambda_{phy} \cdot Ex_j^* \tag{40}$$

$$\frac{d}{dt} Ex_j^* = \lambda_{du} \cdot Ab_P^* - \lambda_{clex} \cdot Ex_j^* - \lambda_{phy} \cdot Ex_j^*$$

$$\frac{d}{dt} Meta_{P,j} = \lambda_{clex} \cdot Ex_j - \lambda_{cl} \cdot Meta_{P,j} - \lambda_{Metaex1} \cdot Meta_{P,j} + \lambda_{Metaex2} \cdot Meta_{ex1,j}$$

$$+ \lambda_{db} \cdot \sum_i (AgAb_{mono,i} + AgAb_{bi,i}) + \lambda_{phy} \cdot Meta_{P,j}^*$$

$$\frac{d}{dt} Meta_{P,j}^* = \lambda_{clex} \cdot Ex_j^* - \lambda_{cl} \cdot Meta_{P,j}^* - \lambda_{Metaex1} \cdot Meta_{P,j}^* + \lambda_{Metaex2} \cdot Meta_{ex1,j}^*$$

$$+ \lambda_{db} \cdot \sum_i (AgAb_{mono,i}^* + AgAb_{bi,i}^*) - \lambda_{phy} \cdot Meta_{P,j}^*$$

(41)

## Physiologically Based Pharmacokinetic Modeling is Essential in <sup>90</sup>Y-labeled Anti-CD66 Radioimmunotherapy

Peter Kletting, Christian Maaß, Sven Reske, Ambros J. Beer, Gerhard Glatting

$$\begin{aligned}
 \frac{d}{dt} Meta_{ex1,j} &= \lambda_{Metaex1} \cdot Meta_{P,j} - (\lambda_{Metaex2} + \lambda_{Metaex3}) \cdot Meta_{ex1,j} \\
 &\quad + \lambda_{Metaex4} \cdot Meta_{ex2,j} + \lambda_{phy} \cdot Meta_{ex1,j}^* \\
 \frac{d}{dt} Meta_{ex1,j}^* &= \lambda_{Metaex1} \cdot Meta_{P,j}^* - (\lambda_{Metaex2} + \lambda_{Metaex3}) \cdot Meta_{ex1,j}^* \\
 &\quad + \lambda_{Metaex4} \cdot Meta_{ex2,j}^* - \lambda_{phy} \cdot Meta_{ex1,j}^*
 \end{aligned} \tag{42}$$

$$\begin{aligned}
 \frac{d}{dt} Meta_{ex2,j} &= \lambda_{Metaex3} \cdot Meta_{ex1,j} - \lambda_{Metaex4} \cdot Meta_{ex2,j} + \lambda_{phy} \cdot Meta_{ex2,j}^* \\
 \frac{d}{dt} Meta_{ex2,j}^* &= \lambda_{Metaex3} \cdot Meta_{ex1,j}^* - \lambda_{Metaex4} \cdot Meta_{ex2,j}^* - \lambda_{phy} \cdot Meta_{ex2,j}^*
 \end{aligned} \tag{43}$$

# Physiologically Based Pharmacokinetic Modeling is Essential in <sup>90</sup>Y-labeled Anti-CD66 Radioimmunotherapy

Peter Kletting, Christian Maaß, Sven Reske, Ambros J. Beer, Gerhard Glatting

**TABLE B Parameter definition**

| Variable        | Description                                                                 | Value                                                     | Unit                                  | Source |
|-----------------|-----------------------------------------------------------------------------|-----------------------------------------------------------|---------------------------------------|--------|
| $r_{im}$        | probability for an antibody arm to be immunoreactive                        | estimated                                                 | unity                                 |        |
| $k_{on, mono}$  | association rate monovalent                                                 | 0.006                                                     | $l \cdot nmol^{-1} \cdot min^{-1}$    | [3]    |
| $k_{on, bi}$    | surface association rate bivalent                                           | $k_{on, bi} = k_{on, mono} \cdot E$                       | $cm^2 \cdot nmol^{-1} \cdot min^{-1}$ | [6]    |
| $k_{off}$       | dissociation rate                                                           | 0.06                                                      | $min^{-1}$                            | [12]   |
| $\alpha_i$      | abbreviation of enhancement factor and surface area of all cells of organ i | $E / (4 \cdot \pi \cdot r_{cell}^2 N_{cells, i})$         | $cm^{-3}$                             | [6]    |
| $E$             | enhancement factor                                                          | 1672000                                                   | $cm^{-1}$                             | [6]    |
| $BW$            | body weight                                                                 | individually measured                                     | kg                                    |        |
| $N_{cell, RM}$  | no. of CD66 expressing cells in the red m.                                  | $188 \cdot 10^8 / kg \cdot BW$                            | unity                                 | [7,13] |
| $N_{cell, S,m}$ | no. of marginating granulocytes in the spleen                               | $N_{cell, S,m} = Ag_{0,S} / Ag_{0,KM} \cdot N_{cell, RM}$ | unity                                 | [14]   |
| $N_{cell, L,m}$ | no. of marginating granulocytes in the liver                                | $N_{cell, L,m} = Ag_{0,L} / Ag_{0,KM} \cdot N_{cell, RM}$ | unity                                 | [14]   |
| $N_{cell, B,c}$ | no. of circulating granulocytes in blood                                    | Equations (5),(6) and (7)                                 | unity                                 | [7,14] |
| $N_{cell, B,m}$ | no. of marginating granulocytes in blood                                    | Equations (5),(6) and (7)                                 | unity                                 | [7,14] |
| $r_{cell}$      | cell radius                                                                 | 6.0                                                       | $\mu m$                               | [15]   |
| $F$             | total plasma flow                                                           | $V \cdot 1.23^*$                                          | $ml \cdot min^{-1}$                   |        |
| $F_L$           | plasma flow liver arterial                                                  | $F \cdot 0.065$                                           | $ml \cdot min^{-1}$                   | [5]    |
| $F_S$           | plasma flow to spleen                                                       | $F \cdot 0.03$                                            | $ml \cdot min^{-1}$                   | [5]    |
|                 |                                                                             |                                                           |                                       |        |
|                 |                                                                             |                                                           |                                       |        |
| $F_{GI}$        | plasma flow to GI tract                                                     | $0.16 \cdot F$                                            | $ml \cdot min^{-1}$                   | [5]    |
| $F_{RM}$        | plasma flow to red marrow                                                   | $F \cdot f_{rm}$                                          | $ml \cdot min^{-1}$                   |        |
| $f_{rm}$        | fractional flow to red marrow                                               | estimated                                                 | %                                     |        |
| $V$             | total plasma volume                                                         | estimated with Bayesian information <sup>†</sup>          | ml                                    |        |
|                 |                                                                             |                                                           |                                       |        |
| $V_{MRI,L}$     | measured total liver volume                                                 | measured individually                                     | ml                                    |        |
| $V_{MRI,S}$     | measured total spleen volume                                                | measured individually                                     | ml                                    |        |

## Physiologically Based Pharmacokinetic Modeling is Essential in <sup>90</sup>Y-labeled Anti-CD66 Radioimmunotherapy

Peter Kletting, Christian Maaß, Sven Reske, Ambros J. Beer, Gerhard Glatting

|                 |                                                                    |                                               |                   |      |
|-----------------|--------------------------------------------------------------------|-----------------------------------------------|-------------------|------|
| $V_{Cal,L}$     | calculated total liver volume                                      | calculated individually                       | ml                | [10] |
| $V_{Cal,S}$     | calculated total spleen volume                                     | calculated individually                       | ml                | [9]  |
|                 |                                                                    |                                               |                   |      |
|                 |                                                                    |                                               |                   |      |
|                 |                                                                    |                                               |                   |      |
| $V_{ROI,L2-L4}$ | blood volume in red marrow ROI from overlapping arteries and veins | 30                                            | ml                | [16] |
| $V_L$           | volume of Ab distribution liver                                    | $V \cdot 0.1$                                 | ml                |      |
| $V_S$           | volume of Ab distribution spleen                                   | $V \cdot 0.014$                               | ml                |      |
| $V_{GI}$        | volume of Ab distribution GI                                       | $0.076 \cdot V$                               | ml                | [5]  |
| $V_{RM}$        | volume of Ab distribution red marrow                               | $0.04 \cdot V$                                | ml                | [5]  |
| $V_P$           | total plasma minus organs                                          | $V - V_L - V_S - V_{GI} - V_{RM}$             | ml                |      |
| $\lambda_{phy}$ | physical decay <sup>111</sup> In and <sup>90</sup> Y               | $1.72 \cdot 10^{-4}$ and $1.80 \cdot 10^{-4}$ | min <sup>-1</sup> |      |
| $k_{in}$        | transport rate $V_P$ to interstitial space                         | 0.0017                                        | min <sup>-1</sup> | [1]  |
| $k_{out}$       | transport rate interstitial space to $V_P$                         | 0.005                                         | min <sup>-1</sup> | [1]  |
| $\lambda_{db}$  | degradation of bound antibody                                      | estimated                                     | min <sup>-1</sup> |      |
| $\lambda_{du}$  | degradation of unbound antibody                                    | $3.9 \cdot 10^{-4}$                           | min <sup>-1</sup> | [1]  |
| $Ab$            | antibody                                                           |                                               |                   |      |
| $PTM$           | pre-therapeutic measurements                                       |                                               |                   |      |
| $a$             | radiochemical purity PTM                                           | 0.94±0.03 measured                            | unity             |      |
| $b$             | radiochemical purity therapy                                       | 0.96±0.03 measured                            | unity             |      |
| $f_{l,PT}$      | fraction of labeled antibody PTM                                   | 2.3±0.3                                       | %                 |      |
| $f_{l,T}$       | fraction of labeled antibody therapy                               | 21±6                                          | %                 |      |
| $Ab_{total,PT}$ | total amount of antibody used for labeling PTM                     |                                               |                   |      |
| $Ab_{total,T}$  | total amount of antibody used for labeling therapy                 |                                               |                   |      |
| $A_{total,T}$   | total amount of activity used for labeling PTM                     |                                               |                   |      |
| $A_{total,PT}$  | total amount of activity used for labeling therapy                 |                                               |                   |      |

## Physiologically Based Pharmacokinetic Modeling is Essential in $^{90}\text{Y}$ -labeled Anti-CD66 Radioimmunotherapy

Peter Kletting, Christian Maaß, Sven Reske, Ambros J. Beer, Gerhard Glatting

|                    |                                                           |  |      |  |
|--------------------|-----------------------------------------------------------|--|------|--|
| $A_{inj,PT}$       | injected activity PTM                                     |  |      |  |
| $A_{inj,T}$        | injected activity therapy                                 |  |      |  |
| $Ab_{inj,PT}^*$    | total amount of radiolabeled injected Ab for PTM          |  | nmol |  |
| $Ab_{inj,PT}$      | total amount of unlabeled injected Ab for PTM             |  | nmol |  |
| $Ab_{inj,T}^*$     | total amount of radiolabeled injected Ab for therapy      |  | nmol |  |
| $Ab_{inj,T}$       | total amount of unlabeled injected Ab for therapy         |  | nmol |  |
| $Ab_{fa,inj,PT}^*$ | radiolabeled injected fully immunoreactive Ab for PTM     |  | nmol |  |
| $Ab_{fa,inj,T}^*$  | radiolabeled injected fully immunoreactive Ab for therapy |  | nmol |  |
| $Ab_{ha,inj,PT}^*$ | radiolabeled injected half immunoreactive Ab for PTM      |  | nmol |  |
| $Ab_{ha,inj,T}^*$  | radiolabeled injected half immunoreactive Ab for therapy  |  | nmol |  |
| $Ab_{na,inj,PT}^*$ | radiolabeled injected none immunoreactive Ab for PTM      |  | nmol |  |
| $Ab_{na,inj,T}^*$  | radiolabeled injected none immunoreactive Ab for therapy  |  | nmol |  |
| $Ab_{fa,inj,PT}$   | unlabeled injected fully immunoreactive Ab for PTM        |  | nmol |  |
| $Ab_{fa,inj,T}$    | unlabeled injected fully immunoreactive Ab for therapy    |  | nmol |  |
| $Ab_{ha,inj,PT}$   | unlabeled injected half immunoreactive Ab for PTM         |  | nmol |  |
| $Ab_{ha,inj,T}$    | unlabeled injected half immunoreactive Ab for therapy     |  | nmol |  |
| $Ab_{na,inj,PT}$   | unlabeled injected none immunoreactive Ab for PTM         |  | nmol |  |
| $Ab_{na,inj,T}$    | unlabeled injected none immunoreactive Ab for therapy     |  | nmol |  |
| $Ab_{fa,i}$        | unbound fully immunoreactive Ab in organ i                |  | nmol |  |
| $Ab_{ha,i}$        | unbound half immunoreactive Ab in organ i                 |  | nmol |  |
| $Ab_{na,i}$        | unbound none immunoreactive Ab in organ i                 |  | nmol |  |
| $Ab_{int,j}$       | unbound antibody of interstitial spaces                   |  | nmol |  |
| $AgAb_{fabi,i}$    | bivalently bound fully immunoreactive Ab of organ i       |  | nmol |  |
| $AgAb_{famonoj}$   | monovalently bound fully immunoreactive Ab of organ i     |  | nmol |  |
| $AgAb_{hamonoj}$   | monovalently bound half immunoreactive Ab of organ i      |  | nmol |  |
| $R_{PT}$           | free nuclides for PTM                                     |  | nmol |  |
| $R_T$              | free nuclides for therapy                                 |  | nmol |  |
| $Ag_i$             | number of free antigens of organ i                        |  | nmol |  |



## Physiologically Based Pharmacokinetic Modeling is Essential in <sup>90</sup>Y-labeled Anti-CD66 Radioimmunotherapy

Peter Kletting, Christian Maaß, Sven Reske, Ambros J. Beer, Gerhard Glatting

|                     |                                                  |                     |                      |      |
|---------------------|--------------------------------------------------|---------------------|----------------------|------|
| $[Ag]_s$            | surface concentration of antigen                 |                     | mol·cm <sup>-2</sup> |      |
| $Ag_{0,i}$          | total antigens of organ i                        | estimated           | nmol                 |      |
| $Ex_j$              | degraded antibody in extra vascular (e.v.) delay |                     | nmol                 | [1]  |
| $Meta_{P,j}$        | degraded antibody in plasma                      |                     | nmol                 | [17] |
| $Meta_{ex1,j}$      | degraded antibody in e.v. 1                      |                     | nmol                 | [17] |
| $Meta_{ex2,j}$      | degraded antibody in e.v. 2                      |                     | nmol                 | [17] |
| $\lambda_{clex}$    | clearance from e.v. delay space                  | $3.9 \cdot 10^{-5}$ | min <sup>-1</sup>    | [1]  |
| $\lambda_{Metaex1}$ | vascular to e.v. 1                               | 0.39                | min <sup>-1</sup>    | [17] |
| $\lambda_{Metaex2}$ | e.v. 1 to vascular                               | 0.17                | min <sup>-1</sup>    | [17] |
| $\lambda_{Metaex3}$ | e.v. 1 to e.v. 2                                 | 0.018               | min <sup>-1</sup>    | [17] |
| $\lambda_{Metaex4}$ | e.v. 2 to e.v. 1                                 | 0.013               | min <sup>-1</sup>    | [17] |
| $\lambda_{cl}$      | clearance from body                              | 0.047               | min <sup>-1</sup>    | [17] |

\*For the average normal adult (blood) F = 6500 ml/min and V = 5300 ml. Therefore, a factor of 1.23 was assigned to account for the changes in total blood flow due to volume changes.

\*\* These values were determined using the average values reported by Shah et al. [4]

† For the total serum volume V, a Bayesian term was derived from the first serum measurement  $V_{m,1} = 100\% / [\%Activity]_{serum,1}$  and the body surface area.[18] V was set to  $V_{m,1}$  and the standard deviation of V to  $V_{m,1} \cdot V_{BSA}$ .

# Physiologically Based Pharmacokinetic Modeling is Essential in <sup>90</sup>Y-labeled Anti-CD66 Radioimmunotherapy

Peter Kletting, Christian Maaß, Sven Reske, Ambros J. Beer, Gerhard Glatting

## References

1. Eger RR, Covell DG, Carrasquillo JA, Abrams PG, Foon KA, et al. (1987) Kinetic model for the biodistribution of an <sup>111</sup>In-labeled monoclonal antibody in humans. *Cancer Res* 47: 3328-3336.
2. Baxter LT, Zhu H, Mackensen DG, Butler WF, Jain RK (1995) Biodistribution of Monoclonal Antibodies: Scale-up Mouse to Human using a Physiologically Based Pharmacokinetic Model. *Cancer Res* 55: 4611-4622.
3. Graff CP, Wittrup KD (2003) Theoretical analysis of antibody targeting of tumor spheroids: importance of dosage for penetration, and affinity for retention. *Cancer Res* 63: 1288-1296.
4. Shah DK, Betts AM (2012) Towards a platform PBPK model to characterize the plasma and tissue disposition of monoclonal antibodies in preclinical species and human. *J Pharmacokinet Pharmacodyn* 39: 67-86.
5. Leggett RW, Williams LR (1995) A proposed blood circulation model for reference man. *Health Phys* 69: 187-201.
6. Kaufman EN, Jain RK (1992) Effect of Bivalent Interaction upon Apparent Antibody Affinity: Experimental Confirmation of Theory Using Fluorescence Photobleaching and Implications for Antibody Binding Assays. *Cancer Res* 52: 4157-4167.
7. Donohue DM, Reiff RH, Hanson ML, Betson Y, Finch CA (1958) Quantitative measurement of the erythrocytic and granulocytic cells of the marrow and blood. *J Clin Invest* 37: 1571-1576.
8. Peters AM, Saverymuttu SH, Bell RN, Lavender JP (1985) Quantification of the distribution of the marginating granulocyte pool in man. *Scand J Haematol* 34: 111-120.
9. Harris A, Kamishima T, Hao HY, Kato F, Omatsu T, et al. (2010) Splenic volume measurements on computed tomography utilizing automatically contouring software and its relationship with age, gender, and anthropometric parameters. *Eur J Radiol* 75: e97-101.
10. Johnson TN, Tucker GT, Tanner MS, Rostami-Hodjegan A (2005) Changes in liver volume from birth to adulthood: a meta-analysis. *Liver Transpl* 11: 1481-1493.
11. Glatting G, Landmann M, Kull T, Wunderlich A, Blumstein NM, et al. (2005) Internal radionuclide therapy: The UlmDos software for treatment planning. *Med Phys* 32: 2399-2405.
12. Johnstone RW, Andrew SM, Hogarth MP, Pietersz GA, McKenzie IFC (1990) The effect of temperature on the binding kinetics and equilibrium constants of monoclonal antibodies to cell surface antigens. *Mol Immunol* 27: 327 - 333.
13. Cartwright GE, Athens JW, Wintrobe MM (1964) Analytical Review: The Kinetics of Granulopoiesis in Normal Man. *Blood*.
14. Peters AM, Saverymuttu SH, Keshavarzian A, Bell RN, Lavender JP (1985) Splenic pooling of granulocytes. *Clin Sci* 68: 283-289.
15. Griffith AW, Cooper JM (1998) Single-Cell Measurements of Human Neutrophil Activation Using Electrorotation. *Anal Chem* 70: 2607-2612.
16. Meredith RF, Shen S, Forero A, Lobuglio A (2008) A method to correct for radioactivity in large vessels that overlap the spine in imaging-based marrow dosimetry of lumbar vertebrae. *J Nucl Med* 49: 279-284.
17. Houston AS, Sampson WF, Macleod MA (1979) A compartmental model for the distribution of <sup>113m</sup>In-DTPA and <sup>99m</sup>Tc-(Sn)DTPA in man following intravenous injection. *Int J Nucl Med Biol* 6: 85-95.
18. Buchmann I, Kull T, Glatting G, Bunjes D, Hale G, et al. (2003) A comparison of the biodistribution and biokinetics of <sup>99m</sup>Tc-anti-CD66 mAb BW 250/183 and <sup>99m</sup>Tc-anti-CD45 mAb YTH 24.5 with regard to suitability for myeloablative radioimmunotherapy. *Eur J Nucl Med Mol Imaging* 30: 667-673.
